# Supplementary material for: Nasopharyngeal Carriage and Antimicrobial Susceptibility Patterns of Streptococcus pneumoniae among Children under Five in Southwest Ethiopia
Source: MDPI journal article supplement (doi:10.3390/children4040027), 2017-04-19
Supplement: s1 [file s1]

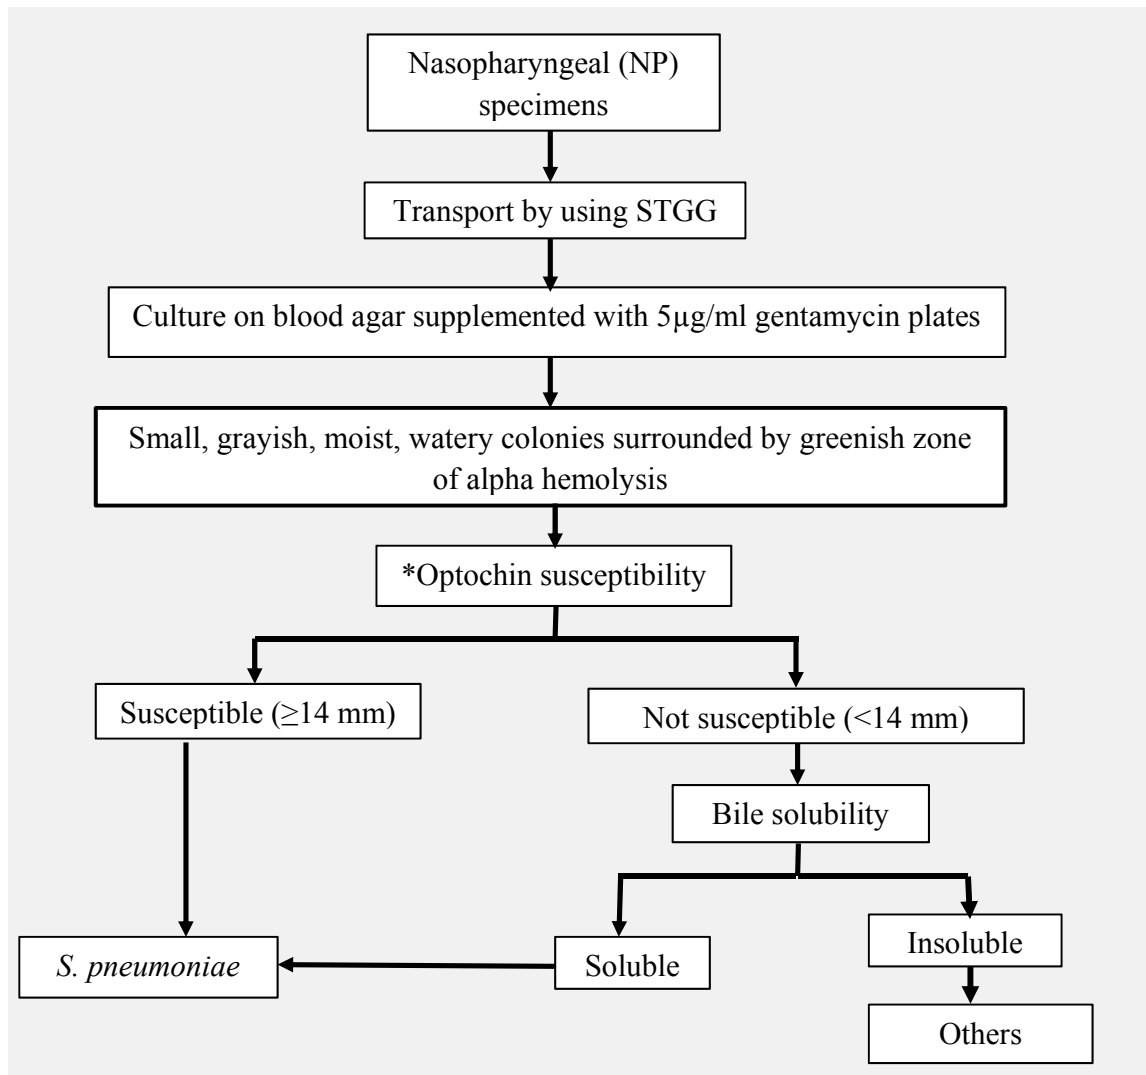

**Figure S1: Flow chart explaining the identification algorithm for *S. pneumoniae* isolates.**

\*Disks with 6 mm diameter and 5µg concentration
